# Supplementary material for: C–C couplings in water by micellar catalysis at low loadings from a recyclable polymer-supported Pd(ii)–NHC nanocatalyst
Source: Royal Society of Chemistry journal article supplement (doi:10.1039/c8py01509k), 2018-11-27
Supplement: c8py01509k1.pdf [file c8py01509k1.pdf]

## Supporting Information

### **C-C couplings in water by micellar catalysis at low loadings from a recyclable polymer-supported Pd(II)-NHC nanocatalyst**

Romain Lambert,<sup>a†</sup> Anne-Laure Wirotius,<sup>a†</sup> Joan Vignolle <sup>a</sup> and Daniel Taton <sup>a\*</sup>

<sup>a</sup>Laboratoire de Chimie des Polymères Organiques, Université de Bordeaux - CNRS UMR 5629 - ENSCPB, 16 Avenue Pey-Berland, F-33607 Pessac Cedex, France.

† These authors contributed equally to this work

E-mail : Daniel.taton@enscbp.fr

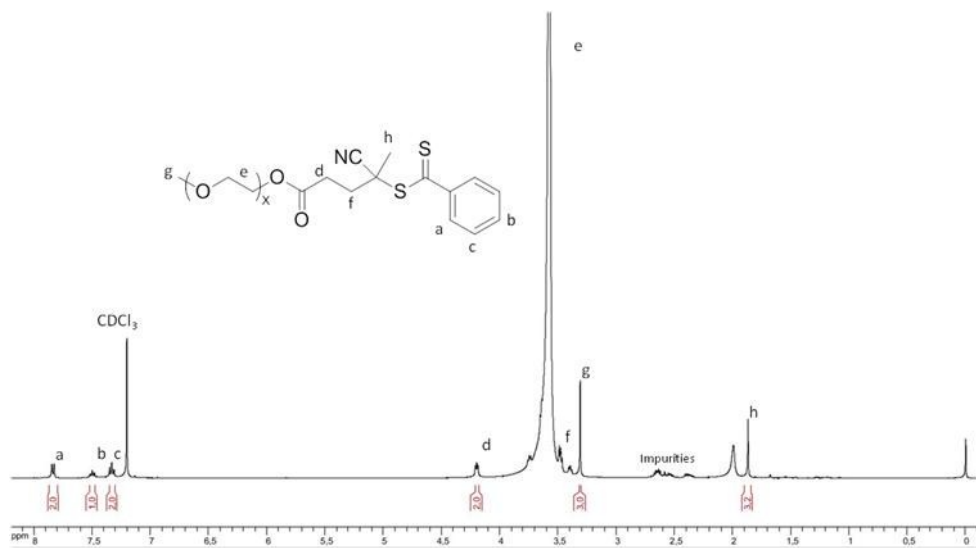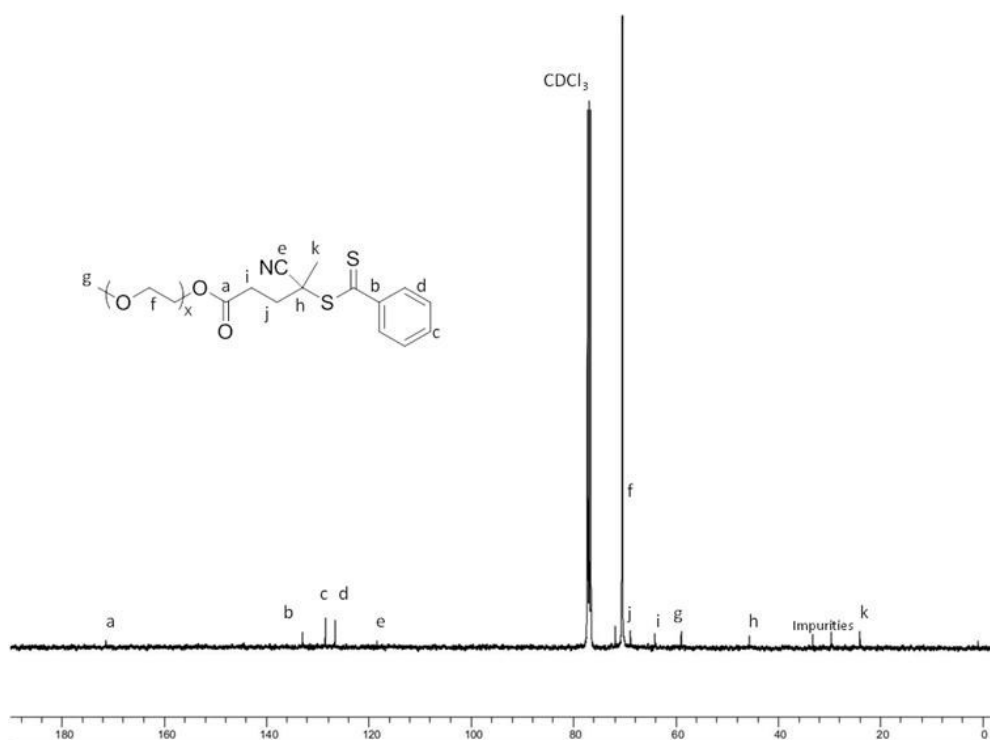

**Figure S01:** <sup>1</sup>H and <sup>13</sup>C NMR spectra of PEO-CTA macro RAFT agent **3** in CDCl<sub>3</sub>.

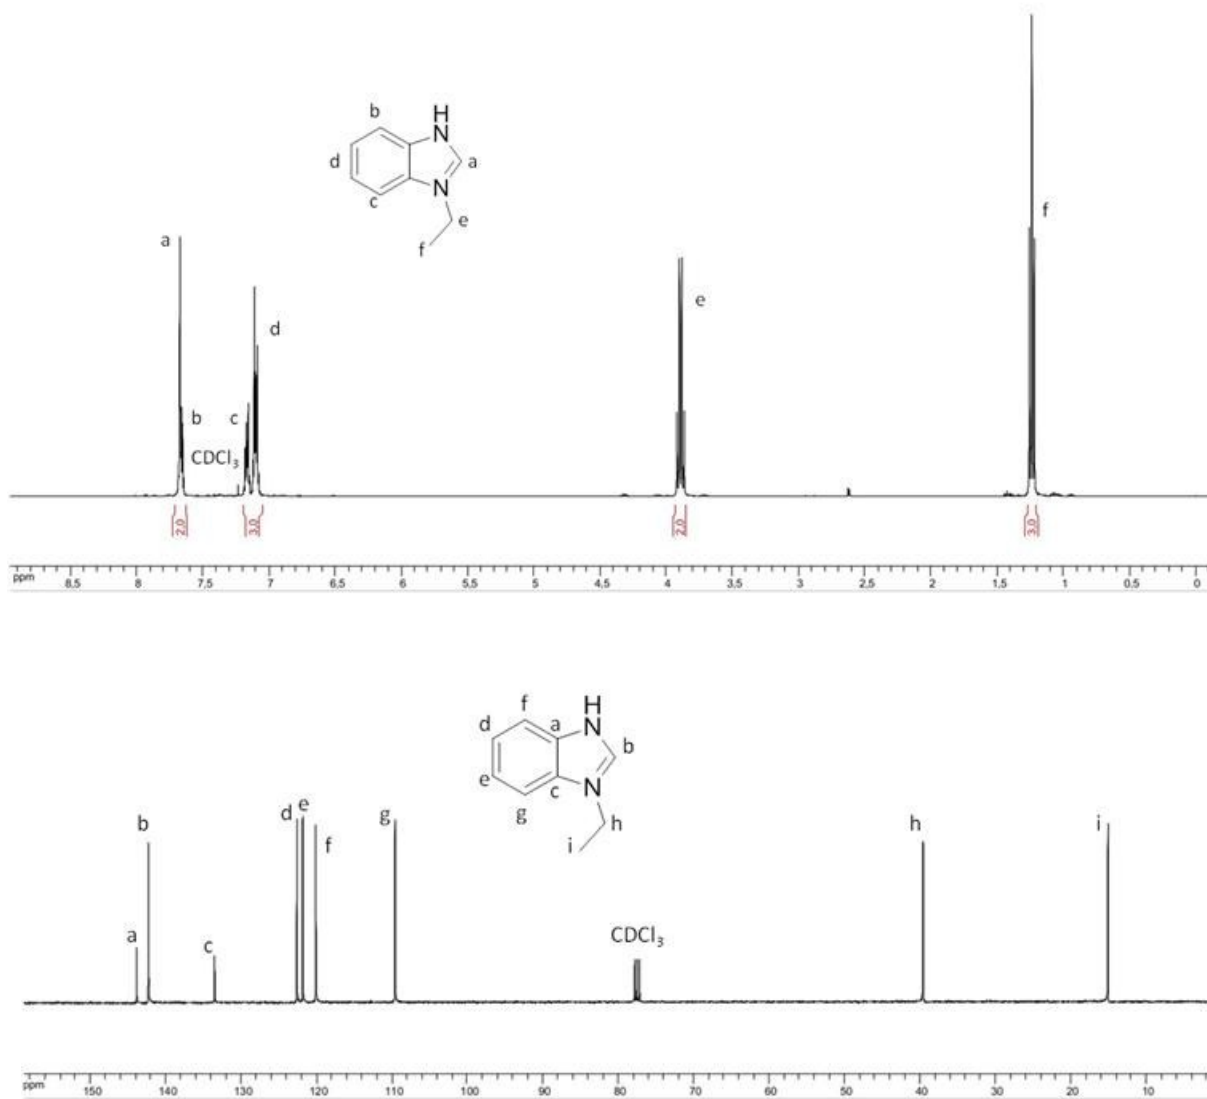

**Figure S02:**  $^1\text{H}$  and  $^{13}\text{C}$  NMR spectra of *N*-ethylbenzimidazole **5** in  $\text{CDCl}_3$ .

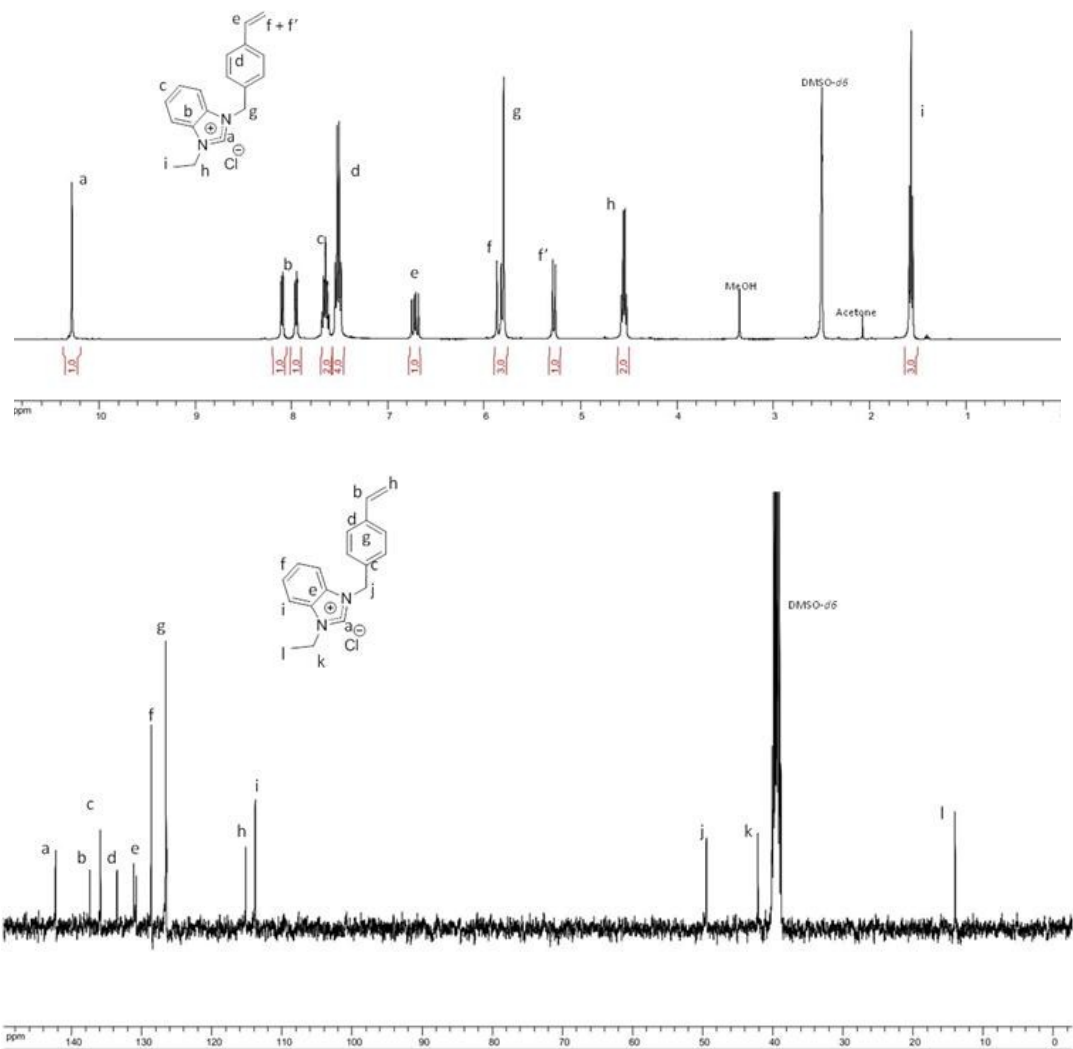

**Figure S03:** <sup>1</sup>H and <sup>13</sup>C NMR spectra of 4-vinylbenzylethylbenzimidazolium chloride **6** in DMSO-*d*<sub>6</sub>.

## Palladium insertion (8)

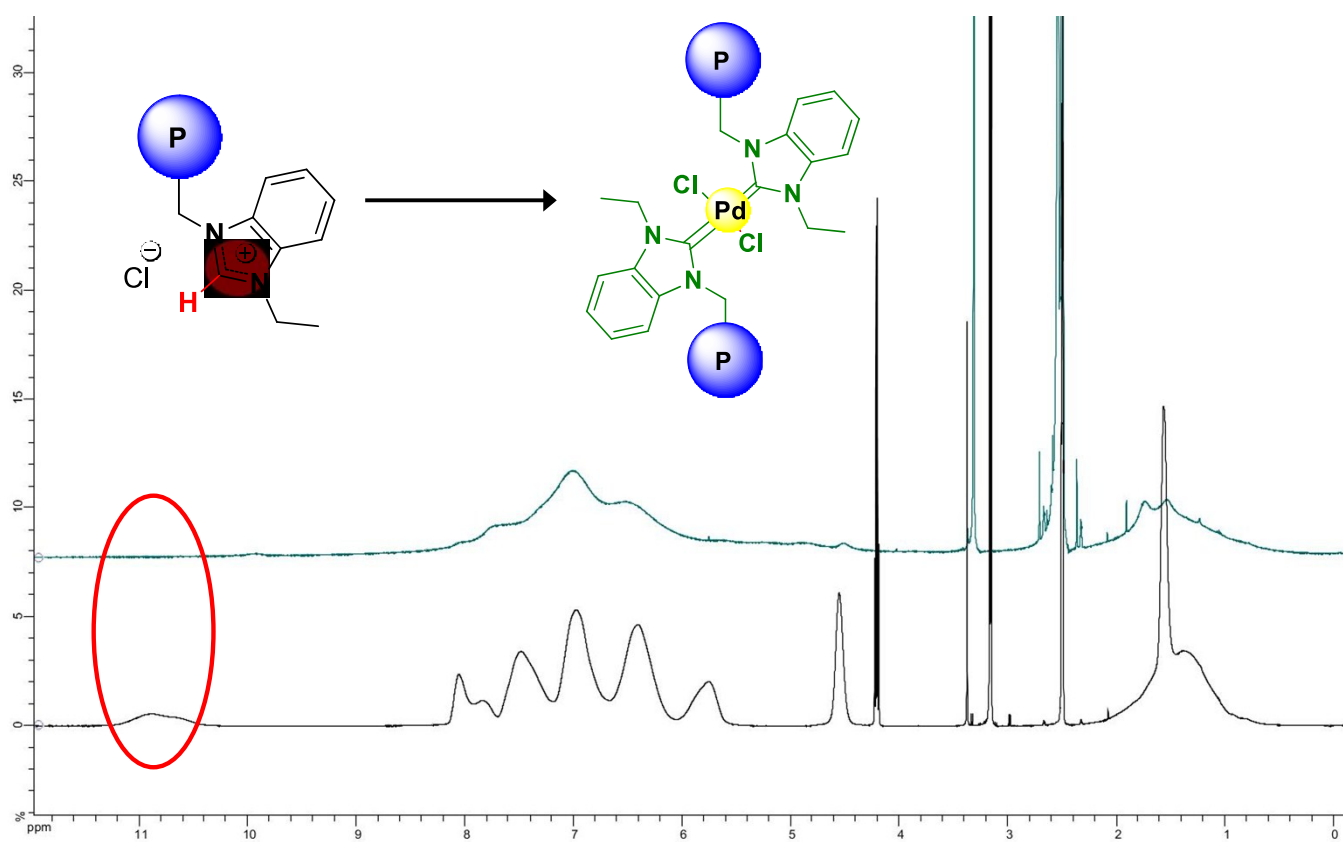

**Figure S04:** <sup>1</sup>H NMR of PEO<sub>114</sub>-*b*-(PS<sub>24</sub>-*co*-PIL(Cl)<sub>11</sub>) (black) and PEO<sub>114</sub>-*b*-(PS<sub>24</sub>-*co*-NHC-Pd<sub>11</sub>) (green) in DMSO-*d*<sub>6</sub>.

**Molecular model: bis(1-butyl-3-ethyl-1H-benzo[d]imidazol-2(3H)-ylidene)palladium(VI) chloride (10)**

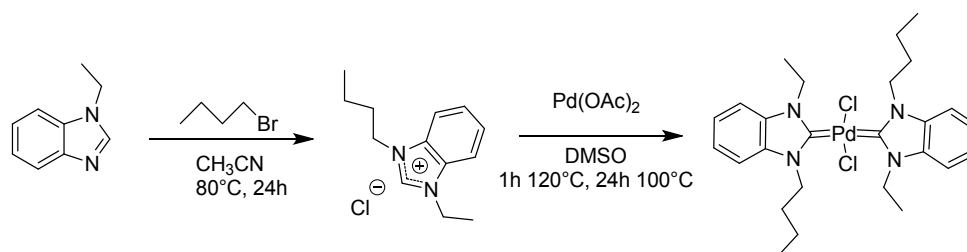

N-ethyl-benzimidazole (2 g, 14 mmol) was dissolved in acetonitrile (10 mL) and 1.72 mL of 1-chlorobutane (1.2 eq., 16 mmol) was added drop-wise. After stirring at 80°C for 24h, the solution was precipitated in ethyl acetate and diethylether and dried under vacuum. A white powder was obtained (0.673 g, 2.8 mmol, yield= 34%).

The next step consists to the addition of Pd(OAc)<sub>2</sub> (0.5 eq., 313 mg, 1,4 mmol) on N-ethyl-N-methylbenzimidazolium chloride (0.673 g, 2.8 mmol) in DMSO (5mL). After stirring 24h at 120°C, the resulting yellow powder was purified by successive precipitation in Et<sub>2</sub>O. (0.574 g, 1.7 mmol, yield= 62%)

**PS-co-P(NHC-Pd) (11)** 4-vinylbenzylethylbenzimidazolium chloride (2.3g, 7.6 mmol), styrene (1.59g, 15 mmol) and AIBN (0.5 mol.%) were dissolved in methanol (12 mL). The solution was degassed by five successive freeze-pump cycles and stirred for 24h at 80 °C. The as-obtained copolymer was purified by dialysis against methanol (1 KDa membrane). 2.70 g, yield = 70 % (NMR <sup>1</sup>H, black line).

In the second step, the PS-co-Poly(4-vinylbenzylethylbenzimidazolium chloride) (241 mg, 1.5 mmol) was dissolved in DMSO (2 mL) and Pd(OAc)<sub>2</sub> (0.5 eq compared to benzimidazoliums units, 50 mg, 0.22 mmol) was added. The reaction was stirred at 120°C for 48h and then precipitated three times in a large excess of Et<sub>2</sub>O and the desired product obtained as a yellow powder. 230 mg, yield = 83 % (NMR <sup>1</sup>H, green line).

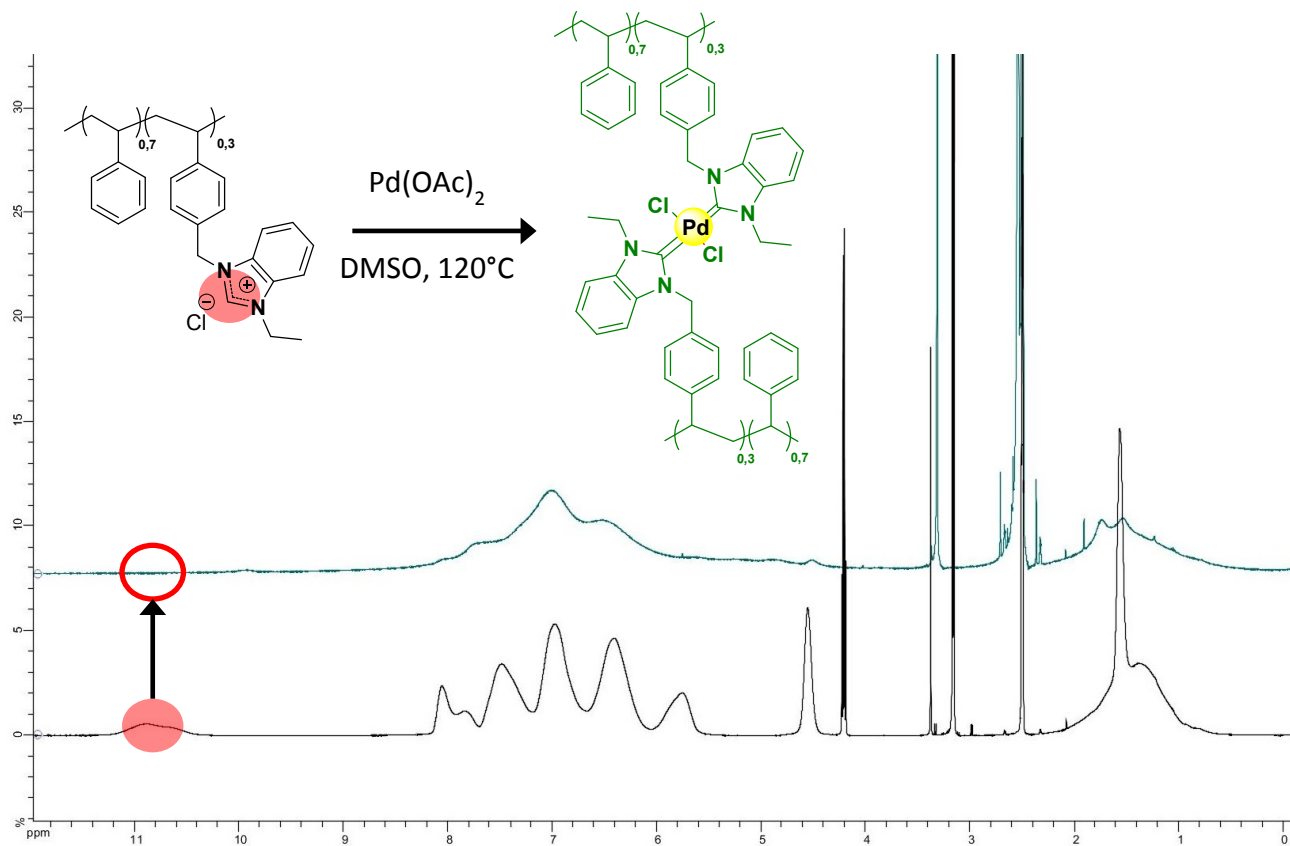

**Figure S05:**  $^1\text{H}$  NMR spectra of PS-*co*-P(NHC-Pd)

### Nanoprecipitation process

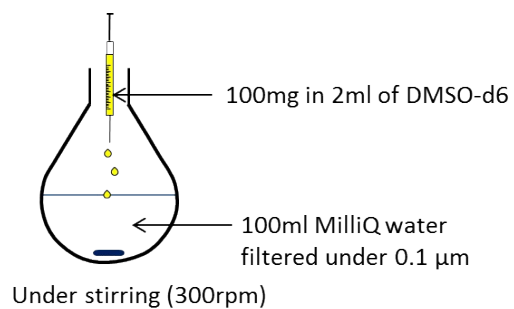

**Figure S06:** Schematic nanoprecipitation process

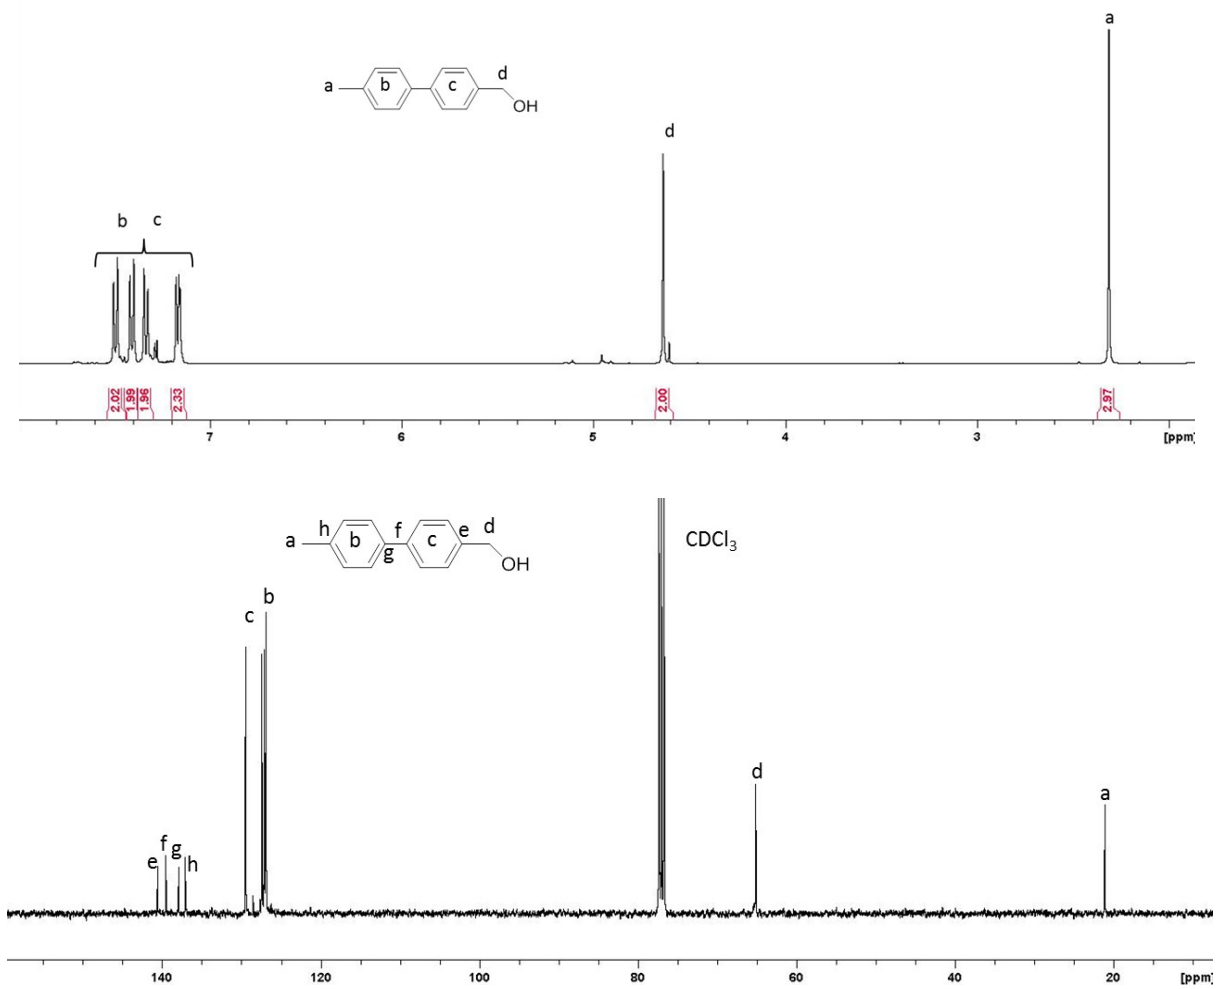

**Figure S07:**  $^1\text{H}$  and  $^{13}\text{C}$  NMR spectra of Suzuki coupling product in  $\text{CDCl}_3$



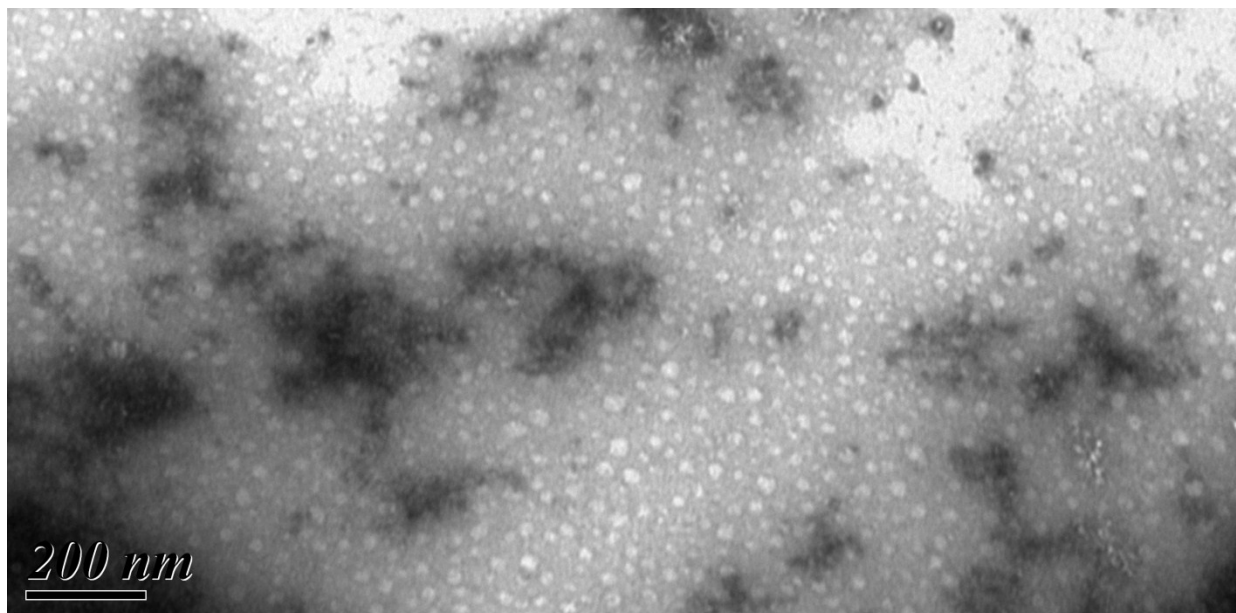

**Figure S08:** TEM picture of the resulting aqueous phase of Suzuki coupling containing micellar catalyst 9 after three extraction cycles of biphenyl product by diethyl ether.

**Heck coupling** In a typical experiment, iodotoluene (480 mg, 2.2 mmol), methyl acrylate (1.5 eq., 299  $\mu$ L, 3.3 mmol) and potassium carbonate (2 eq., 608 mg, 4.4 mmol) were introduced in a Schlenk tube. 5 mL of micelles were added (cat. 0.1 mol%) and solution was stirred under argon during 20 minutes. The solution was stirred for 24 h at 110  $^{\circ}$ C. After cooling down to room temperature, the mixture was washed by ethylacetate three times, dried on MgSO<sub>4</sub> and evaporated under vacuum during 1h. Product was analyzed by <sup>1</sup>H NMR in CDCl<sub>3</sub>. A total conversion was calculated by <sup>1</sup>H NMR in CDCl<sub>3</sub> without any residual iodotoluene.

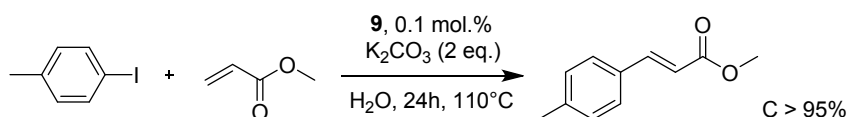

<sup>1</sup>H-NMR (400 MHz, CDCl<sub>3</sub>):  $\delta$  = 7.60 (d, 1H),  $\delta$  = 7.32 (d, 2H),  $\delta$  = 7.22 (d, 2H),  $\delta$  = 6.72 (d, 1H),  $\delta$  = 3.15 (s, 3H),  $\delta$  = 2.28 (s, 3H).

<sup>13</sup>C-NMR (100.7 MHz, CDCl<sub>3</sub>):  $\delta$  = 168.0, 142.1, 140.0, 133.0, 129.5, 129.0, 112.2, 38.2, 22.5.

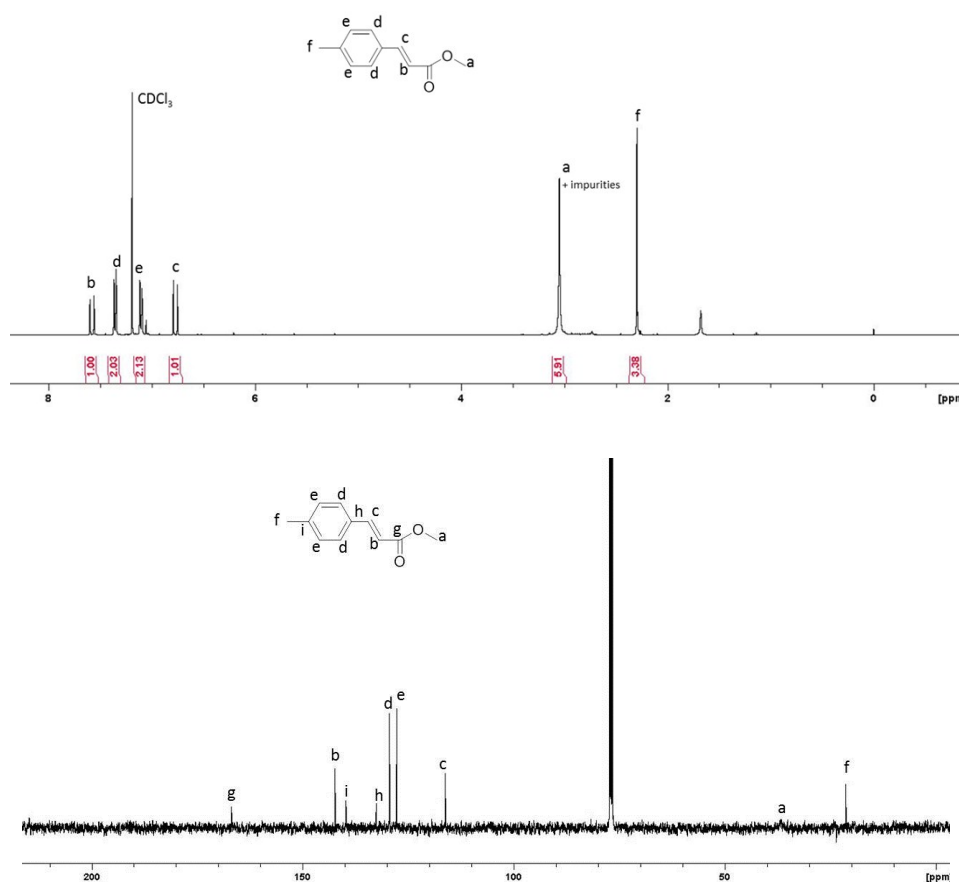

**Figure S09:** <sup>1</sup>H and <sup>13</sup>C NMR spectra of Heck coupling product in CDCl<sub>3</sub>.

**Table S01:** Detailed substrate scope for Suzuki coupling in water

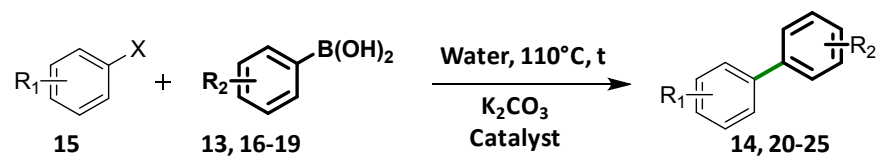

| Entry | Catalyst | Conc. (mol.%) | X  | t(h) | Conv. (%) | Reaction product |
|-------|----------|---------------|----|------|-----------|------------------|
| 1     | 9        | 0.1           | I  | 24   | 100       |                  |
| 2     | 9        | 0.1           | I  | 1    | 100       |                  |
| 3     | 10       | 0.1           | I  | 1    | 40        |                  |
| 4     | 9        | 0.1           | Br | 24   | 85        |                  |
| 5     | 9        | 0.1           | Cl | 24   | 35        |                  |
| 6     | 10       | 0.1           | Cl | 24   | 0         |                  |
| 7     | 9        | 5             | Cl | 24   | 86        |                  |
| 8     | 10       | 5             | Cl | 24   | 14        |                  |
| 9     | 9        | 0.1           | Br | 1    | 85        |                  |
| 10    | 9        | 0.1           | I  | 1    | 98        |                  |
| 11    | 10       | 0.1           | I  | 1    | 63        |                  |
| 12    | 10       | 5             | I  | 1    | 86        |                  |
| 13    | 9        | 0.1           | Br | 1    | 97        |                  |
| 14    | 9        | 0.1           | I  | 1    | 100       |                  |
| 15(b) | 9        | 0.1           | Br | 1    | 56        |                  |
| 15    | 9        | 0.1           | Br | 6    | 100       |                  |
| 16    | 9        | 0.1           | I  | 1    | 100       |                  |
| 17    | 10       | 0.1           | I  | 1    | 49        |                  |
| 18    | 10       | 5             | I  | 1    | 52        |                  |
| 19(b) | 9        | 0.1           | Cl | 1    | 43        |                  |
| 19    | 9        | 0.1           | Cl | 6    | 100       |                  |
| 20    | 9        | 0.1           | Br | 6    | 100       |                  |
| 21    | 9        | 0.1           | Br | 1    | 100       |                  |

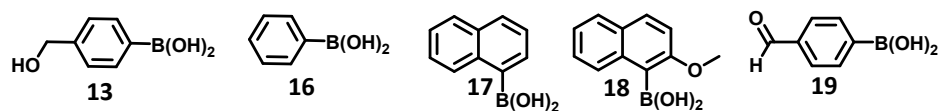

## Substrate scope for Suzuki coupling in water

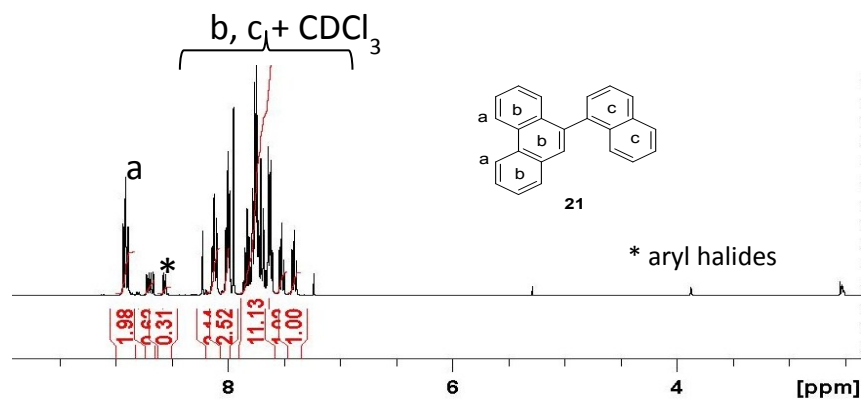

Figure S10:  $^1\text{H}$  spectrum of Suzuki coupling product **21** in  $\text{CDCl}_3$ . (Table 2; entry 10-13)

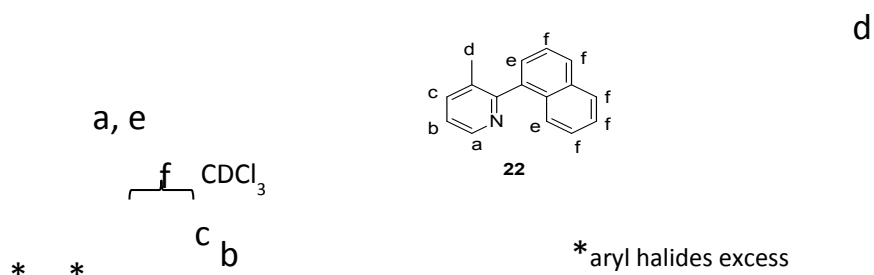

Figure S11:  $^1\text{H}$  spectrum of Suzuki coupling product **22** in  $\text{CDCl}_3$ . (Table 2; entry 14-15)

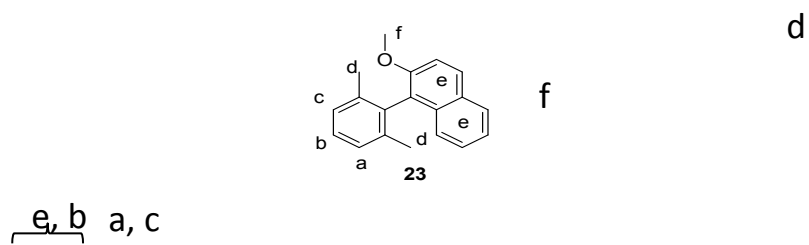

Figure S12:  $^1\text{H}$  spectrum of Suzuki coupling product **23** in  $\text{CDCl}_3$ . (Table 2; entry 16-19)

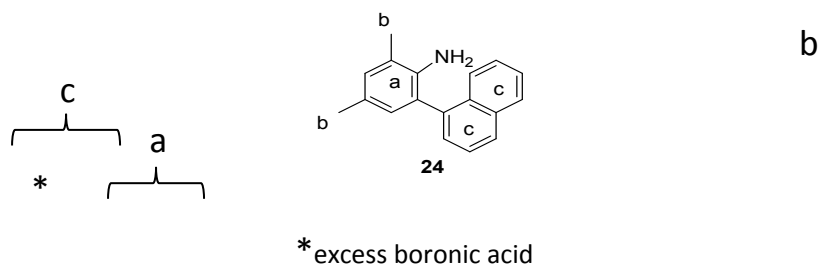

**Figure S13:**  $^1\text{H}$  spectrum of Suzuki coupling product **24** in  $\text{CDCl}_3$ . (Table 2; entry 20)

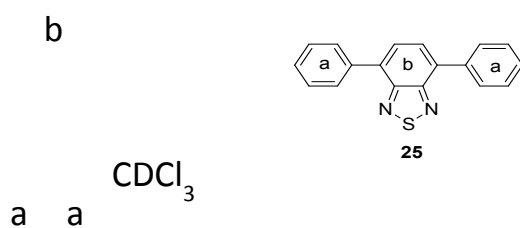

**Figure S14:**  $^1\text{H}$  spectrum of Suzuki coupling product **25** in  $\text{CDCl}_3$ . (Table 2; entry 21)
